# Supplementary material for: Theoretical exploration on the activity of copper single-atom catalysts for electrocatalytic reduction of CO2
Source: Royal Society of Chemistry journal article supplement (doi:10.1039/d2ta09599h), 2023-01-01
Supplement: d2ta09599h1.pdf [file d2ta09599h1.pdf]

## Supporting Information

### Theoretical exploration on activity of copper single-atom catalyst for electrocatalytic reduction of CO<sub>2</sub>

Junyong Min<sup>a,b</sup>, Lei Liu<sup>c</sup>, Fengjuan Chen<sup>a,\*</sup>, Xuekun Jin<sup>d</sup>, Tianjiao Yuan<sup>b</sup>, Xiaoqian

Yao<sup>b,\*</sup>

<sup>a</sup> Key Laboratory of Solid State Physics and Devices Autonomous Region, School of Physics Science and Technology, Xinjiang University, Urumqi 830046, Xinjiang, P. R. China

<sup>b</sup> Beijing Key Laboratory of Ionic Liquids Clean Process, CAS Key Laboratory of Green Process and Engineering, State Key Laboratory of Multiphase Complex Systems, Institute of Process Engineering, Chinese Academy of Sciences, Beijing 100190, P.R. China

<sup>c</sup> Center for Computational Chemistry, College of Chemistry and Chemical Engineering, Wuhan Textile University, Wuhan, 430200, China

<sup>d</sup> School of Environment, Tsinghua University, Beijing 100084, P. R. China

# Contents

1. Figure S1: Electron density of states diagram for 11 kinds of catalysts; pink dashed line: d-band center of Cu atom, gray dashed line: Fermi energy level.
2. Figure S2:  $\text{CuN}_4$ ,  $\text{CuN}_3\text{V}$ , and  $\text{CuN}_2\text{V}_2$  for (a) charge density difference, (b) electron localization function. The iso-surface value was set to be  $0.005 \text{ e}\cdot\text{\AA}^{-3}$  and the positive and negative charges are shown in yellow and cyan, respectively.
3. Figure S3: Optimized geometries of  $\text{CO}_2\text{RR}$  adsorbates on (a) saturated coordination catalysts and (b) unsaturated coordination catalysts.
4. Figure S4: Linear scaling relationships for  $\Delta G_{*}\text{COOH}$  and  $(\Delta G_{\text{CO}} - \Delta G_{*}\text{CO})$ ,  $(\Delta G_{*}\text{COOH} - \Delta G_{*}\text{CO}_2)$ .
5. Figure S5: Schematic diagram of the reaction process for the reduction of  $\text{CO}_2$  to  $\text{CO}$  on  $\text{CuN}_4$ .
6. Figure S6: Gibbs free energy ( $\Delta G$ ) diagram of  $\text{CO}_2\text{RR}$  on  $\text{CuN}_3\text{V}$  with the addition of the implicit solvent model.
7. Figure S7: HER free energy diagram for single-atom Cu (Cu-N/C) catalysts.
8. Figure S8: Position number of hydrogen protons adsorbed on  $\text{CuN}_3\text{V}$ .
9. Figure S9: Position number of hydrogen protons adsorbed on  $\text{CuN}_2\text{V}_2$ .
10. Figure S10:  $\text{CO}_2\text{RR}$  (a, b and c) and HER (d, e and f) transition states of hydrogen protons adsorbed at sites 4, 7 and 2 on  $\text{CuN}_3\text{V}$ .
11. Figure S11: The adsorption configurations of multiple hydrogen protons on  $\text{CuN}_3\text{V}$  with their corresponding numbers.
12. Figure S12: Transition state energy barriers of (a) and (b)  $*\text{CO}_2$  to  $*\text{COOH}$ , (c) HER on  $\text{CuN}_3\text{V}$  saturated by hydrogen protons.
13. Figure S13: Transition state energy barrier for all of  $\text{CO}_2\text{RR}$  on  $\text{CuN}_3\text{V}$
14. Table S1: Average bond length ( $d_{\text{Cu-N}}$ ), Bader charge transfer ( $Q_{\text{Cu}}$  and  $Q_{\text{N}}$ ), binding energy ( $E_{\text{b}}$ ), the d-band center of Cu atoms ( $\epsilon_{\text{d}}$ ), binding energy, ( $E_{\text{b}}$ ) formation energy ( $E_{\text{f}}$ ), and solvation potential ( $U_{\text{diss}}$ ) for Cu-N catalysts. The bond length is in  $\text{\AA}$ , the Bader charge is in  $e^-$ , the d-band center, the binding energy ( $E_{\text{b}}$ ),

and the formation energy ( $E_f$ ) are in eV, and the solvation potential ( $U_{\text{diss}}$ ) is in V.

15. Table S2: Calculated standard potentials for reactions given by Eq. (1) to (4), standard conditions, 298 K, pH = 0.
16. Table S3: The adsorption energy corresponding to the position number of the hydrogen proton adsorbed on  $\text{CuN}_3\text{V}$ .
17. Table S4: The adsorption energy corresponding to the position number of the hydrogen proton adsorbed on  $\text{CuN}_2\text{V}_2$ .
18. Table S5: The  $\text{CO}_2\text{RR}$  and HER transition state energy barriers for hydrogen proton adsorption at different sites on  $\text{CuN}_3\text{V}$ .
19. Table S6: The adsorption energy corresponding to the position of multiple hydrogen protons adsorbed on  $\text{CuN}_3\text{V}$ .
20. Table S7: Average bond lengths ( $d_{\text{Cu-N}}$  and  $d_{\text{Cu-C}}$ ) of Cu-N and Cu-C (\*COOH), Bader charge transfer of Cu atoms ( $Q_{\text{Cu}}$ ), and d-band center of Cu atoms ( $\epsilon_d$ ) of the catalysts for  $\text{CuN}_4$ ,  $\text{CuN}_3\text{V}$ , and  $\text{CuN}_2\text{V}_2$  without adsorbed intermediates and after adsorption of COOH. The bond lengths are in Å, the Bader charges are in  $e^-$ , and the d-band centers are in eV.

## Calculation method

The adsorption energy is calculated by:

$$\Delta E_{ads} = E_{total} - (E_{adsorbate} + E_{slab})$$

where  $E_{total}$ ,  $E_{slab}$  and  $E_{adsorbate}$  represent the energy containing the catalyst adsorbate, catalyst and adsorbate, respectively.

The formula for calculating the free energy of adsorption of reactants or intermediates:

$$\Delta G_{ads} = \Delta E_{ads} + \Delta ZPE - T\Delta S$$

where  $\Delta E_{ads}$  is calculated from the adsorption energy equation,  $\Delta ZPE$  and  $\Delta S$  are the zero-point energy and entropy changes at 298.15 K, which are calculated from the vibrational frequency, and the entropy of the gas-phase molecules from the NIST database.

Equation for the change in Gibbs free energy ( $\Delta G$ ) of CO<sub>2</sub>RR:

$$\Delta G = \Delta E + \Delta ZPE - T\Delta S + \Delta G_{pH} + \Delta G_U$$

where  $\Delta E$  is the reaction energy difference of the reaction step in CO<sub>2</sub>RR, which can be obtained directly from the DFT calculation, and  $\Delta ZPE$  and  $\Delta S$  are the same values as in the adsorption free energy equation;  $\Delta G_{pH}$  is the free energy correction for pH, which is zero in this work; and  $\Delta G_U = -eU$ , where U is the electrode potential of the electrochemical step.

The binding energy ( $E_b$ ) is calculated as:

$$E_b = E_{M-N/C} - E_{N-C} - E_M$$

where  $E_{M-N/C}$ ,  $E_{N-C}$  and  $E_M$  are the structure after anchoring the metal atom, the

structure without anchoring the metal atom and the energy of the metal single atom, respectively.

The cohesive energy ( $E_c$ ) is calculated as:

$$E_c = E_{bulk} - E_M$$

where  $E_{bulk}$  is the energy of a single metal atom in the bulk phase.

The energy of formation ( $E_f$ ) is calculated as:

$$E_f = E_{M-N/C} + n_C \mu_C - (E_{V-gra} + n_N \mu_N + E_{bulk})$$

where  $n_C$  and  $n_N$  are the number of C atoms replaced by N atoms and the number of nitrogen atoms in the catalyst, respectively,  $\mu_C$  and  $\mu_N$  are the chemical potentials of C and N, respectively, corresponding to the energy of a single C atom in bulk-phase graphene and the energy of a single N atom in nitrogen, and  $E_{V-gra}$  is the energy of the graphene structure without the intercalated N and metal atoms.

The dissolution potential ( $U_{diss}$ ) is calculated as:

$$U_{diss} = U_{diss}^\circ - \frac{E_f}{ne^-}$$

where  $U_{diss}^\circ$  is the standard dissolution potential of the metal and n is the number of electrons involved in the dissolution (n=2).

The d-band center of the catalyst is calculated as:

$$\varepsilon_d = \frac{\int_{-\infty}^{\infty} n_d(\varepsilon) \varepsilon d\varepsilon}{\int_{-\infty}^{\infty} n_d(\varepsilon) d\varepsilon}$$

where  $n_d(\varepsilon)$  represents the total d state of the copper atoms in Cu-N/C.

we consider the following surface electrochemical process on model Cu-N/C:

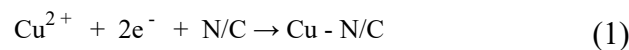

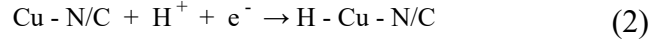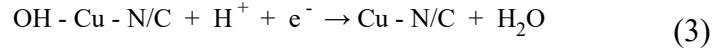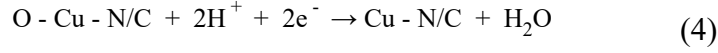

The electromotive force of a hypothetical galvanic cell is obtained by dividing calculated  $\Delta G$  (in eV) by the number of electrons exchanged in the reaction. Taking that the anode is SHE ( $E^\circ = 0$  V), the obtained values are numerically equal to the standard electrode potentials for reactions (2)-(4). For the construction of the surface Pourbaix plots, the activity ( $a$ ) of  $\text{Cu}^{2+}$  ions was taken to be  $1 \times 10^{-8} \text{ mol} \cdot \text{dm}^{-3}$ . This is a typical value for construction of Pourbaix plots and the change of  $\text{Cu}^{2+}$  concentration by one order of magnitude only shifts the potential of Eq. (1) vertically along the potential axis of a given Pourbaix plot by 0.059 V (at room temperature).

We constructed surface Pourbaix plots for the studied model Cu-N/C at standard conditions and at 298 K. Considered surface processes include:

(i) metal dissolution, Eq. (1), with Nernst equation:

$$E(\text{Cu}^{2+}/\text{Cu - N/C}) = E^\circ(\text{Cu}^{2+}/\text{Cu - N/C}) - (0.059/2) \times \log a(\text{Cu}^{2+}) \quad (5)$$

(ii) hydrogen deposition, Eq. (2), with Nernst equation:

$$E(\text{H - Cu - N/C}/\text{Cu - N/C}) = E^\circ(\text{H - Cu - N/C}/\text{Cu - N/C}) - 0.059 \times \text{pH} \quad (6)$$

(iii) Cu-N/C oxidation via deposition of  $\text{OH}_{\text{ads}}$ , Eq. (3), with Nernst equation:

$$E(\text{OH - Cu - N/C}/\text{Cu - N/C}) = E^\circ(\text{OH - Cu - N/C}/\text{Cu - N/C}) - 0.059 \times \text{pH} \quad (7)$$

(iv) Cu-N/C oxidation via deposition of  $\text{O}_{\text{ads}}$ , Eq. (4), with Nernst equation:

$$E(\text{O - Cu - N/C}/\text{Cu - N/C}) = E^\circ(\text{O - Cu - N/C}/\text{Cu - N/C}) - 0.059 \times \text{pH} \quad (8)$$

The calculated standard potentials ( $E^\circ(\text{O/R})$ ) are summarized in Table S2. Metal

dissolution, Eq. (1) is not pH-dependent, but  $H_{\text{ads}}$ ,  $OH_{\text{ads}}$ , and  $O_{\text{ads}}$  formation are, with the slope of the equilibrium potential versus pH line of 0.059 mV per pH unit in all the cases. When the equilibrium potentials were calculated using Eqs. (5)-(8) for pH ranging from 0 to 14, the stable phases were identified following the rule that the most stable oxidized phase had the lowest equilibrium potential, while the most stable reduced phase was the one with the highest equilibrium potential.

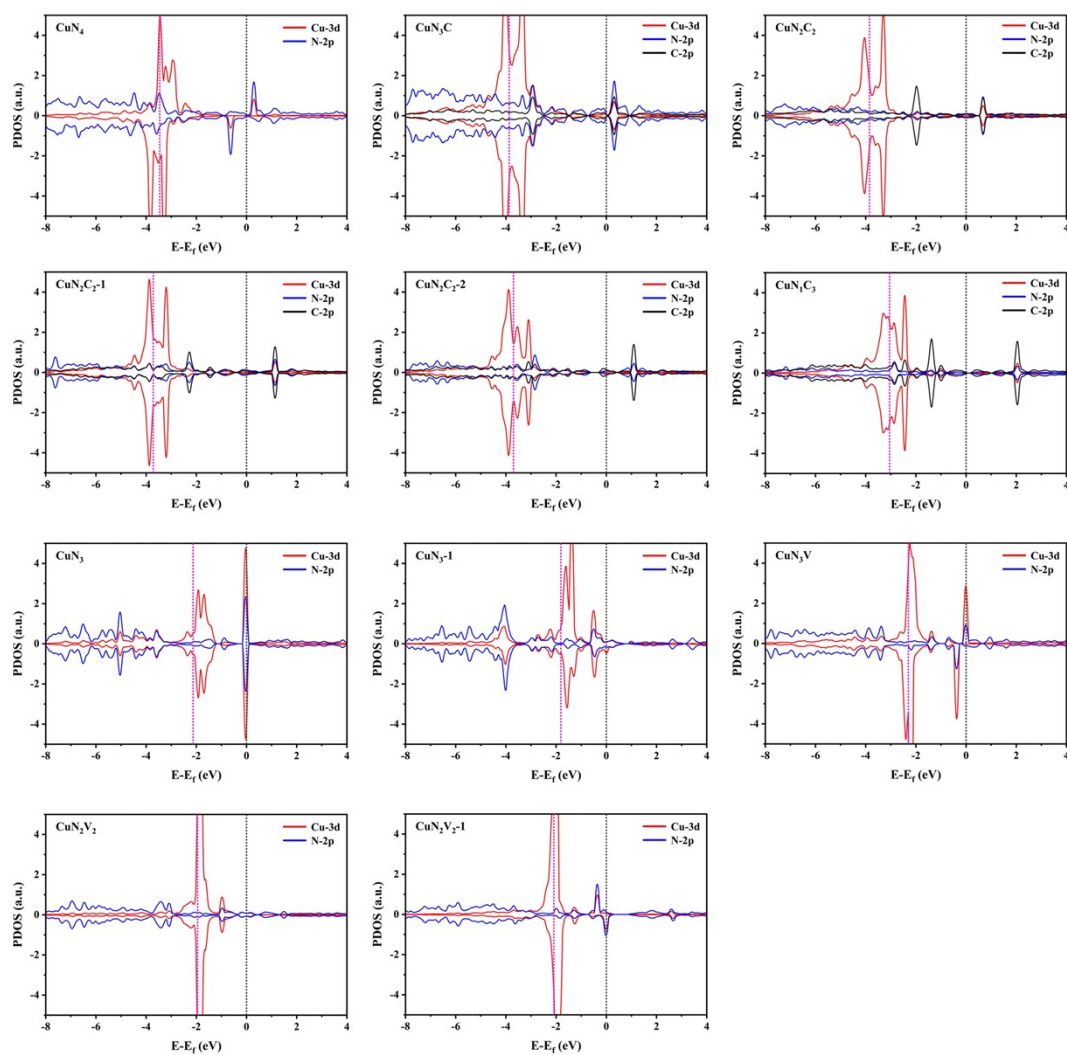

**Fig. S1** Electron density of states diagram for 11 kinds of catalysts; pink dashed line: d-band center of Cu atom, gray dashed line: Fermi energy level.



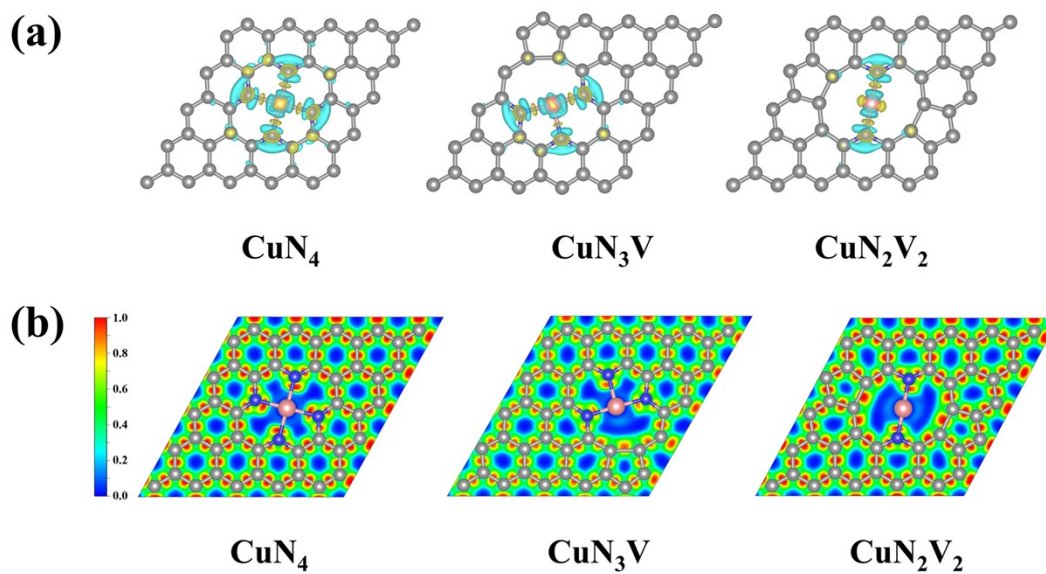

**Fig. S2**  $\text{CuN}_4$ ,  $\text{CuN}_3\text{V}$  and  $\text{CuN}_2\text{V}_2$  for (a) charge density difference, (b) electron localization function. The iso-surface value was set to be  $0.005 \text{ e} \cdot \text{\AA}^{-3}$  and the positive and negative charges are shown in yellow and cyan, respectively.

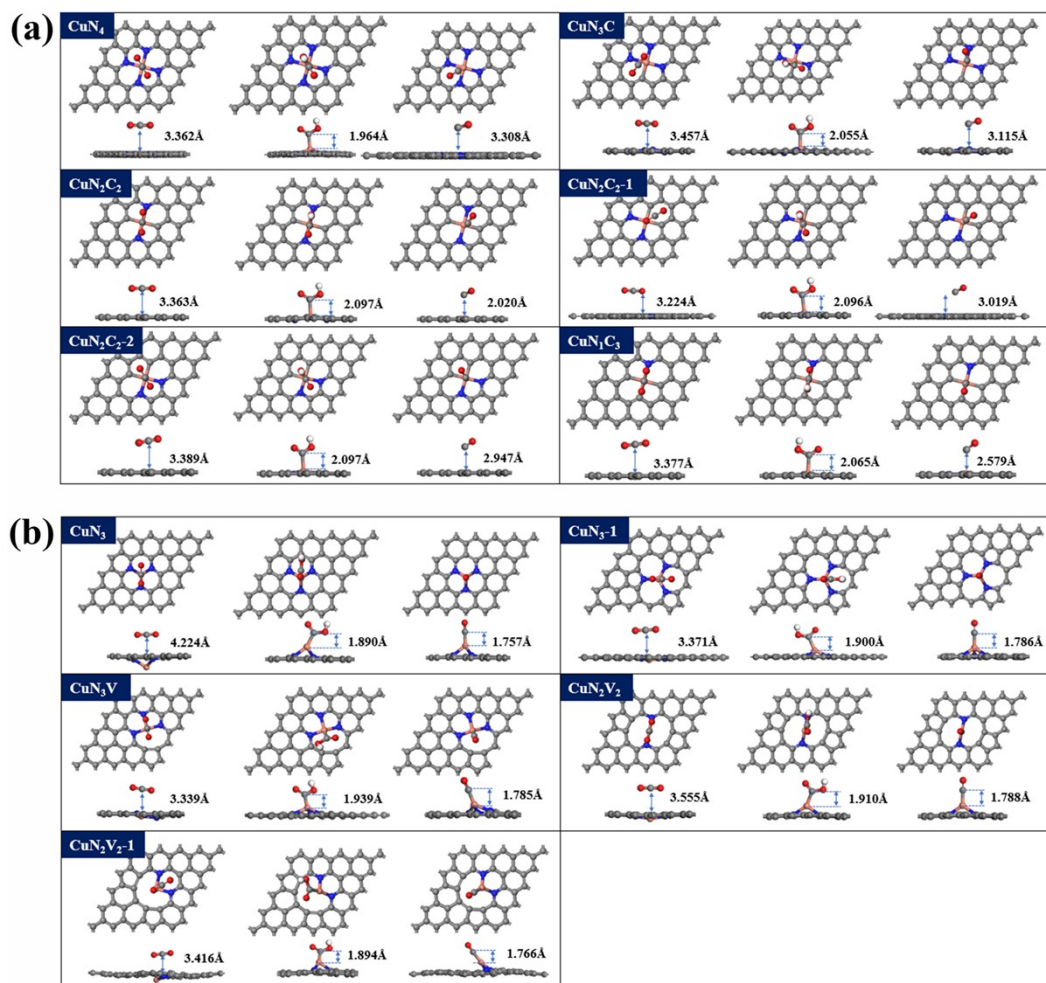

**Fig. S3** Optimized geometries of CO<sub>2</sub>RR adsorbates on (a) saturated coordination catalysts and (b) unsaturated coordination catalysts.

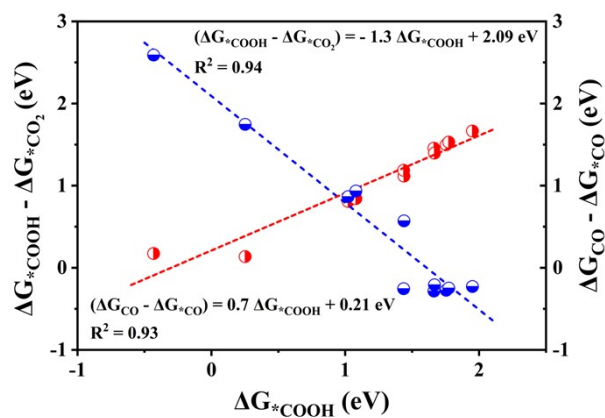

**Fig. S4** Linear scaling relationships for  $\Delta G_{*COOH}$  and  $(\Delta G_{*CO} - \Delta G_{*CO_2})$ ,  $(\Delta G_{*COOH} - \Delta G_{*CO_2})$ .

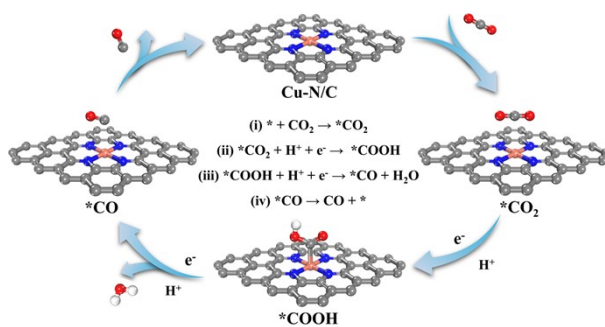

**Fig. S5** Schematic diagram of the reaction process for the reduction of  $CO_2$  to  $CO$  on  $CuN_4$ .

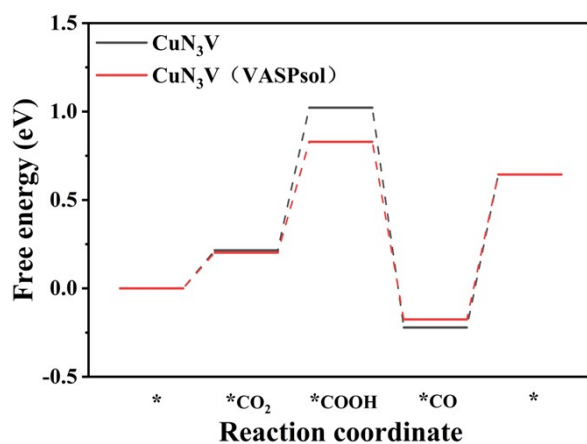

**Fig. S6** Gibbs free energy ( $\Delta G$ ) diagram of CO<sub>2</sub>RR on CuN<sub>3</sub>V with the addition of the implicit solvent model.

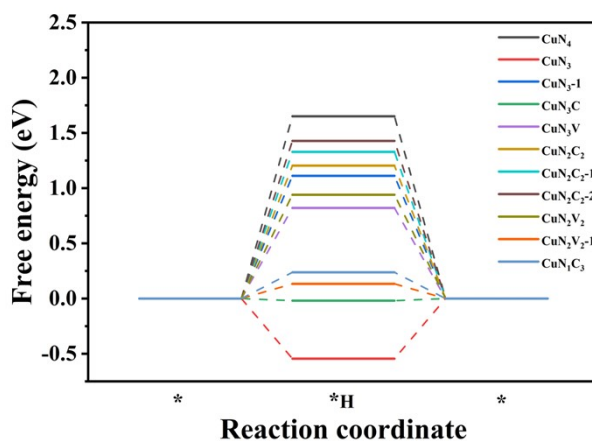

**Fig. S7** HER free energy diagram for single-atom Cu (Cu-N/C) catalysts.

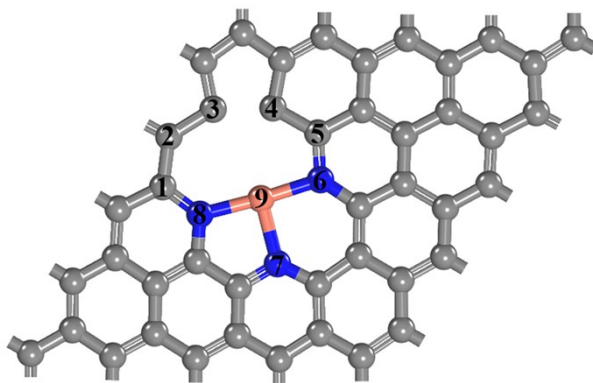

**Fig. S8** Position number of hydrogen protons adsorbed on  $\text{CuN}_3\text{V}$ .

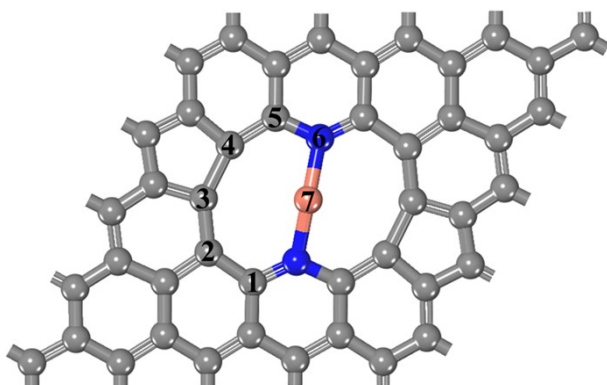

**Fig. S9** Position number of hydrogen protons adsorbed on  $\text{CuN}_2\text{V}_2$ .

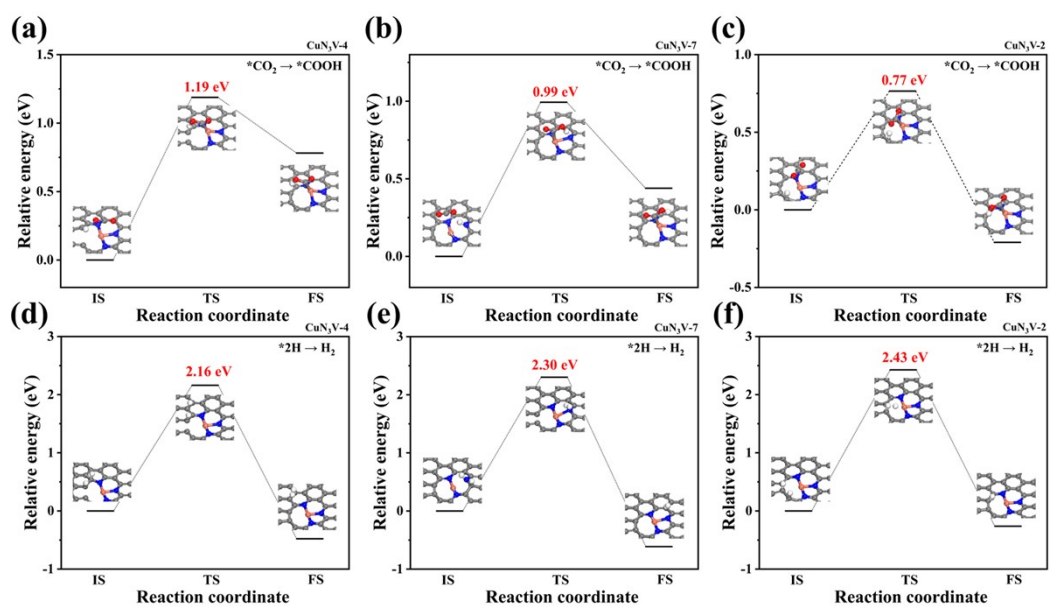

**Fig. S10** CO<sub>2</sub>RR (a, b and c) and HER (d, e and f) transition states of hydrogen protons adsorbed at sites 4, 7 and 2 on CuN<sub>3</sub>V.

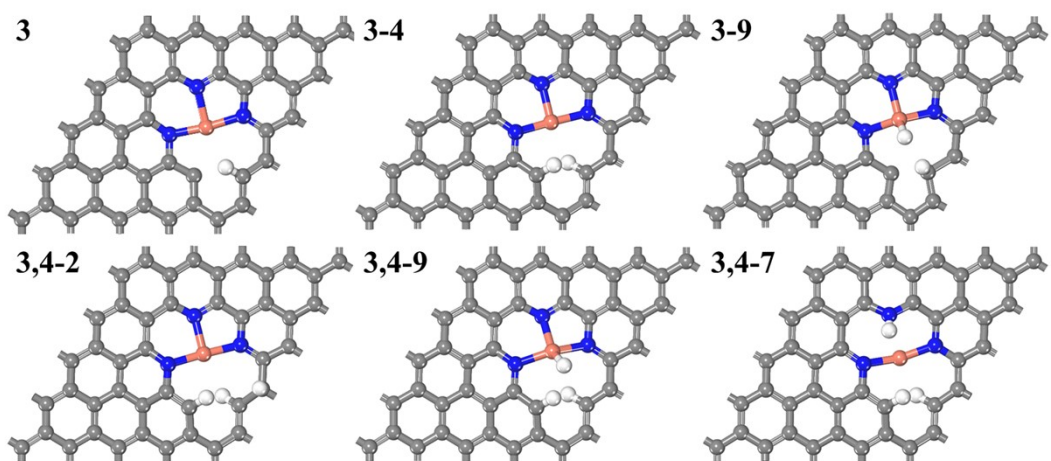

**Fig. S11** The adsorption configurations of multiple hydrogen protons on CuN<sub>3</sub>V with their corresponding numbers.

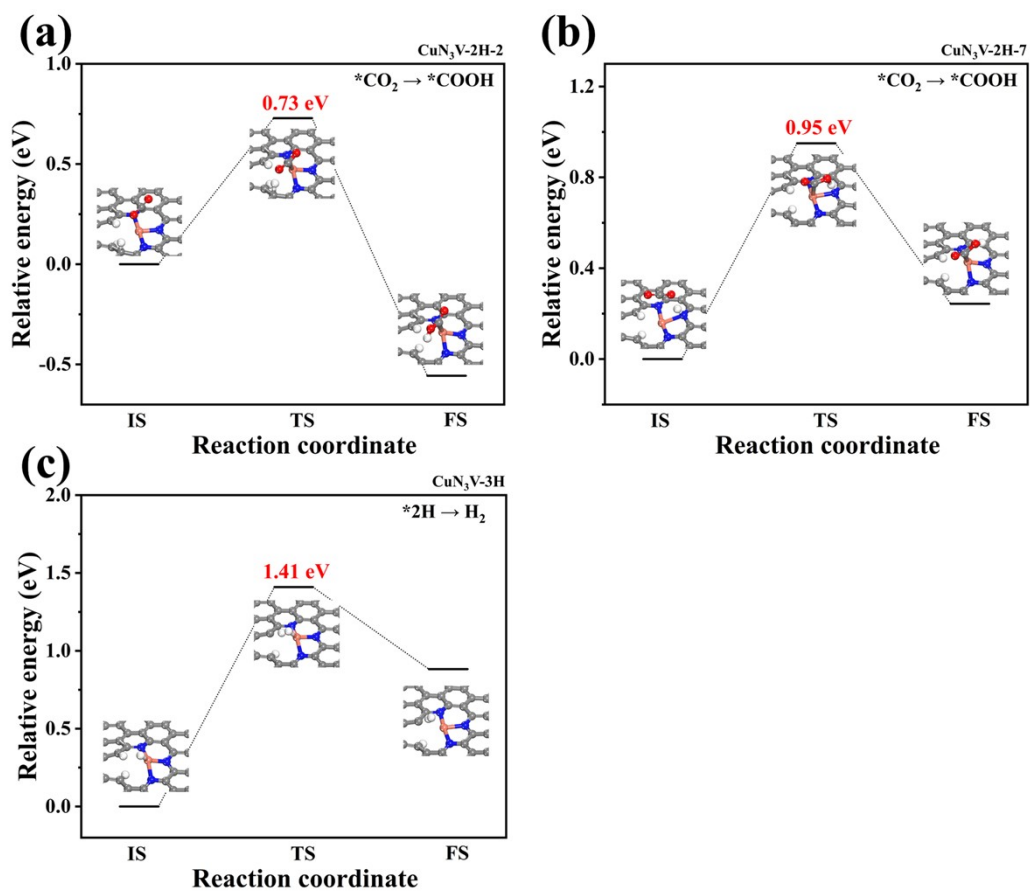

**Fig. S12** Transition state energy barriers of (a) and (b)  $*\text{CO}_2$  to  $*\text{COOH}$ , (c) HER on CuN<sub>3</sub>V saturated by hydrogen protons.



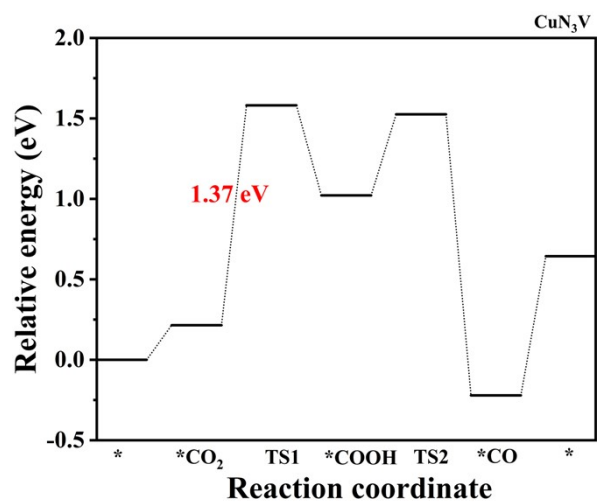

**Fig. S13** Transition state energy barrier for all of CO<sub>2</sub>RR on CuN<sub>3</sub>V

**Table S1** Average bond length ( $d_{\text{Cu-N}}$ ), Bader charge transfer ( $Q_{\text{Cu}}$  and  $Q_{\text{N}}$ ), binding energy ( $E_{\text{b}}$ ), the d-band center of Cu atoms ( $\epsilon_{\text{d}}$ ), binding energy, ( $E_{\text{b}}$ ) formation energy ( $E_{\text{f}}$ ), and solvation potential ( $U_{\text{diss}}$ ) for Cu-N catalysts. The bond length is in Å, the Bader charge is in  $e^-$ , the d-band center, the binding energy ( $E_{\text{b}}$ ), and the formation energy ( $E_{\text{f}}$ ) are in eV, and the solvation potential ( $U_{\text{diss}}$ ) is in V.

| <b>System</b>                      | <b><math>d_{\text{Cu-N}}</math></b> | <b><math>Q_{\text{Cu}}</math></b> | <b><math>Q_{\text{N}}</math></b> | <b><math>\epsilon_{\text{d}}</math></b> | <b><math>E_{\text{b}}</math></b> | <b><math>E_{\text{f}}</math></b> | <b><math>U_{\text{diss}}</math></b> |
|------------------------------------|-------------------------------------|-----------------------------------|----------------------------------|-----------------------------------------|----------------------------------|----------------------------------|-------------------------------------|
| CuN <sub>4</sub>                   | 1.93                                | -0.92                             | 1.21                             | -3.46                                   | -5.42                            | -7.80                            | 4.24                                |
| CuN <sub>3</sub> C                 | 1.91                                | -0.85                             | 1.19                             | -3.87                                   | -7.75                            | -6.77                            | 3.72                                |
| CuN <sub>2</sub> C <sub>2</sub>    | 1.91                                | -0.81                             | 1.15                             | -3.85                                   | -8.46                            | -5.73                            | 3.21                                |
| CuN <sub>2</sub> C <sub>2</sub> -1 | 1.91                                | -0.77                             | 1.22                             | -3.72                                   | -8.69                            | -5.80                            | 3.24                                |
| CuN <sub>2</sub> C <sub>2</sub> -2 | 1.93                                | -0.74                             | 1.22                             | -3.77                                   | -9.59                            | -6.28                            | 3.48                                |
| CuN <sub>1</sub> C <sub>3</sub>    | 1.94                                | -0.71                             | 1.20                             | -3.05                                   | -8.97                            | -5.03                            | 2.86                                |
| CuN <sub>3</sub>                   | 1.72                                | -0.63                             | 1.27                             | -2.13                                   | -4.26                            | -5.10                            | 2.89                                |
| CuN <sub>3</sub> -1                | 1.81                                | -0.73                             | 1.10                             | -1.81                                   | -7.34                            | -9.24                            | 4.96                                |
| CuN <sub>3</sub> V                 | 1.88                                | -0.74                             | 1.28                             | -2.30                                   | -5.88                            | -7.77                            | 4.23                                |
| CuN <sub>2</sub> V <sub>2</sub>    | 1.75                                | -0.58                             | 1.22                             | -1.95                                   | -6.71                            | -7.32                            | 4.00                                |
| CuN <sub>2</sub> V <sub>2</sub> -1 | 1.93                                | -0.79                             | 1.25                             | -2.09                                   | -5.32                            | -3.20                            | 1.94                                |

**Table S2** Calculated standard potentials for reactions given by Eq. (1) to (4), standard conditions, 298 K, pH = 0.

| <b>System</b>                      | <b>E°(Cu<sup>2+</sup>/Cu-N/C)/V</b> | <b>E°( Cu-N/C /H-Cu-N/C)/V</b> | <b>E°(O-Cu-N/C/ Cu-N/C)/V</b> | <b>E°(OH-Cu-N/C/ Cu-N/C)/V</b> |
|------------------------------------|-------------------------------------|--------------------------------|-------------------------------|--------------------------------|
| CuN <sub>4</sub>                   | 1.06                                | -1.65                          | 1.96                          | 1.76                           |
| CuN <sub>3</sub>                   | 0.49                                | 0.54                           | 0.49                          | -0.66                          |
| CuN <sub>3</sub> C                 | 2.23                                | 0.02                           | 0.62                          | 1.73                           |
| CuN <sub>3</sub> V                 | 1.30                                | -0.82                          | 1.42                          | 0.91                           |
| CuN <sub>3</sub> -1                | 2.02                                | -1.11                          | 1.59                          | 1.41                           |
| CuN <sub>2</sub> C <sub>2</sub>    | 2.58                                | -1.20                          | 2.01                          | 1.73                           |
| CuN <sub>2</sub> C <sub>2</sub> -1 | 2.70                                | -1.33                          | 2.11                          | 1.80                           |
| CuN <sub>2</sub> C <sub>2</sub> -2 | 3.15                                | -1.43                          | 2.03                          | 1.66                           |
| CuN <sub>2</sub> V <sub>2</sub>    | 1.71                                | -0.94                          | 1.39                          | 0.79                           |
| CuN <sub>2</sub> V <sub>2</sub> -1 | 1.01                                | -0.13                          | 0.91                          | -0.13                          |
| CuN <sub>1</sub> C <sub>3</sub>    | 2.83                                | -0.24                          | 0.74                          | 2.25                           |

**Table S3** The adsorption energy corresponding to the position number of the hydrogen proton adsorbed on CuN<sub>3</sub>V.

| *H                           | 1(C) | 2(C) | 3(C)  | 4(C)  | 5(C) | 6(N) | 7(N) | 8(N) | 9(Cu) |
|------------------------------|------|------|-------|-------|------|------|------|------|-------|
| $\Delta E_{\text{ads}}$ (eV) | 0.97 | 0.63 | -0.56 | -0.40 | 0.89 | 0.66 | 0.22 | 0.80 | 0.62  |

**Table S4** The adsorption energy corresponding to the position number of the hydrogen proton adsorbed on CuN<sub>2</sub>V<sub>2</sub>.

| *H                           | 1    | 2    | 3     | 4     | 5    | 6    | 7    |
|------------------------------|------|------|-------|-------|------|------|------|
| $\Delta E_{\text{ads}}$ (eV) | 0.84 | 0.57 | -0.10 | -0.18 | 0.92 | 0.50 | 0.77 |

**Table S5** The CO<sub>2</sub>RR and HER transition state energy barriers for hydrogen proton adsorption at different sites on CuN<sub>3</sub>V.

| *H-site                 | 4    | 7    | 2    |
|-------------------------|------|------|------|
| CO <sub>2</sub> RR (eV) | 1.19 | 0.99 | 0.77 |
| HER (eV)                | 2.16 | 2.30 | 2.43 |

**Table S6** The adsorption energy corresponding to the position of multiple hydrogen protons adsorbed on CuN<sub>3</sub>V.

| *H                           | 3     | 3-4   | 3-9  | 3,4-2 | 3,4-9 | 3,4-7 |
|------------------------------|-------|-------|------|-------|-------|-------|
| $\Delta E_{\text{ads}}$ (eV) | -0.56 | -1.89 | 0.90 | 1.36  | 0.90  | 0.58  |

**Table S7** Average bond lengths ( $d_{\text{Cu-N}}$  and  $d_{\text{Cu-C}}$ ) of Cu-N and Cu-C (\*COOH), Bader charge transfer of Cu atoms ( $Q_{\text{Cu}}$ ), and d-band center of Cu atoms ( $\epsilon_{\text{d}}$ ) of the catalysts for  $\text{CuN}_4$ ,  $\text{CuN}_3\text{V}$ , and  $\text{CuN}_2\text{V}_2$  without adsorbed intermediates and after adsorption of COOH. The bond lengths are in Å, the Bader charges are in  $e^-$ , and the d-band centers are in eV.

| System                               | $Q_{\text{Cu}}$ | $d_{\text{Cu-N}}$ | $\epsilon_{\text{d}}$ | $d_{\text{Cu-C}}$ |
|--------------------------------------|-----------------|-------------------|-----------------------|-------------------|
| $\text{CuN}_4$                       | -0.92           | 1.93              | -3.46                 | \                 |
| $\text{CuN}_4\text{-COOH}$           | -0.87           | 2.01              | -2.71                 | 1.96              |
| $\text{CuN}_3\text{V}$               | -0.74           | 1.88              | -2.30                 | \                 |
| $\text{CuN}_3\text{V-COOH}$          | -0.82           | 1.95              | -2.44                 | 1.94              |
| $\text{CuN}_2\text{V}_2$             | -0.58           | 1.75              | -1.95                 | \                 |
| $\text{CuN}_2\text{V}_2\text{-COOH}$ | -0.73           | 1.97              | -2.22                 | 1.91              |
